# Supplementary material
Source: PubMed Central journal article supplement (PMC3392117)

S-Fig 1

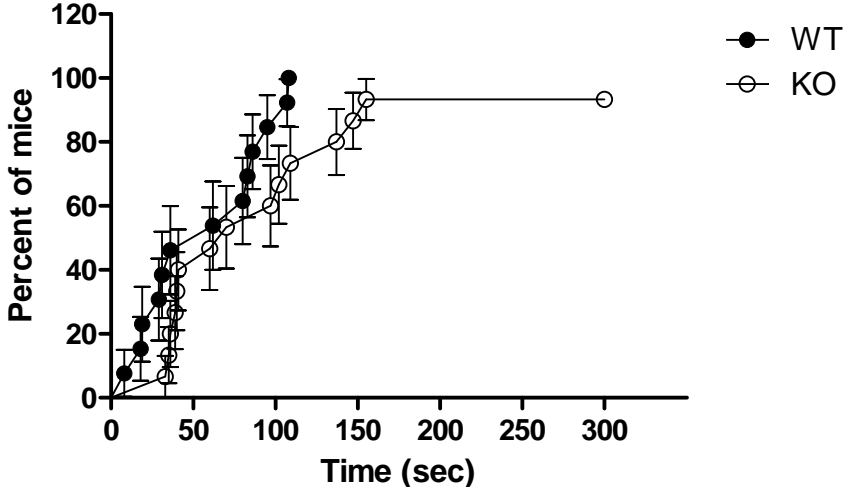

S-Fig 2

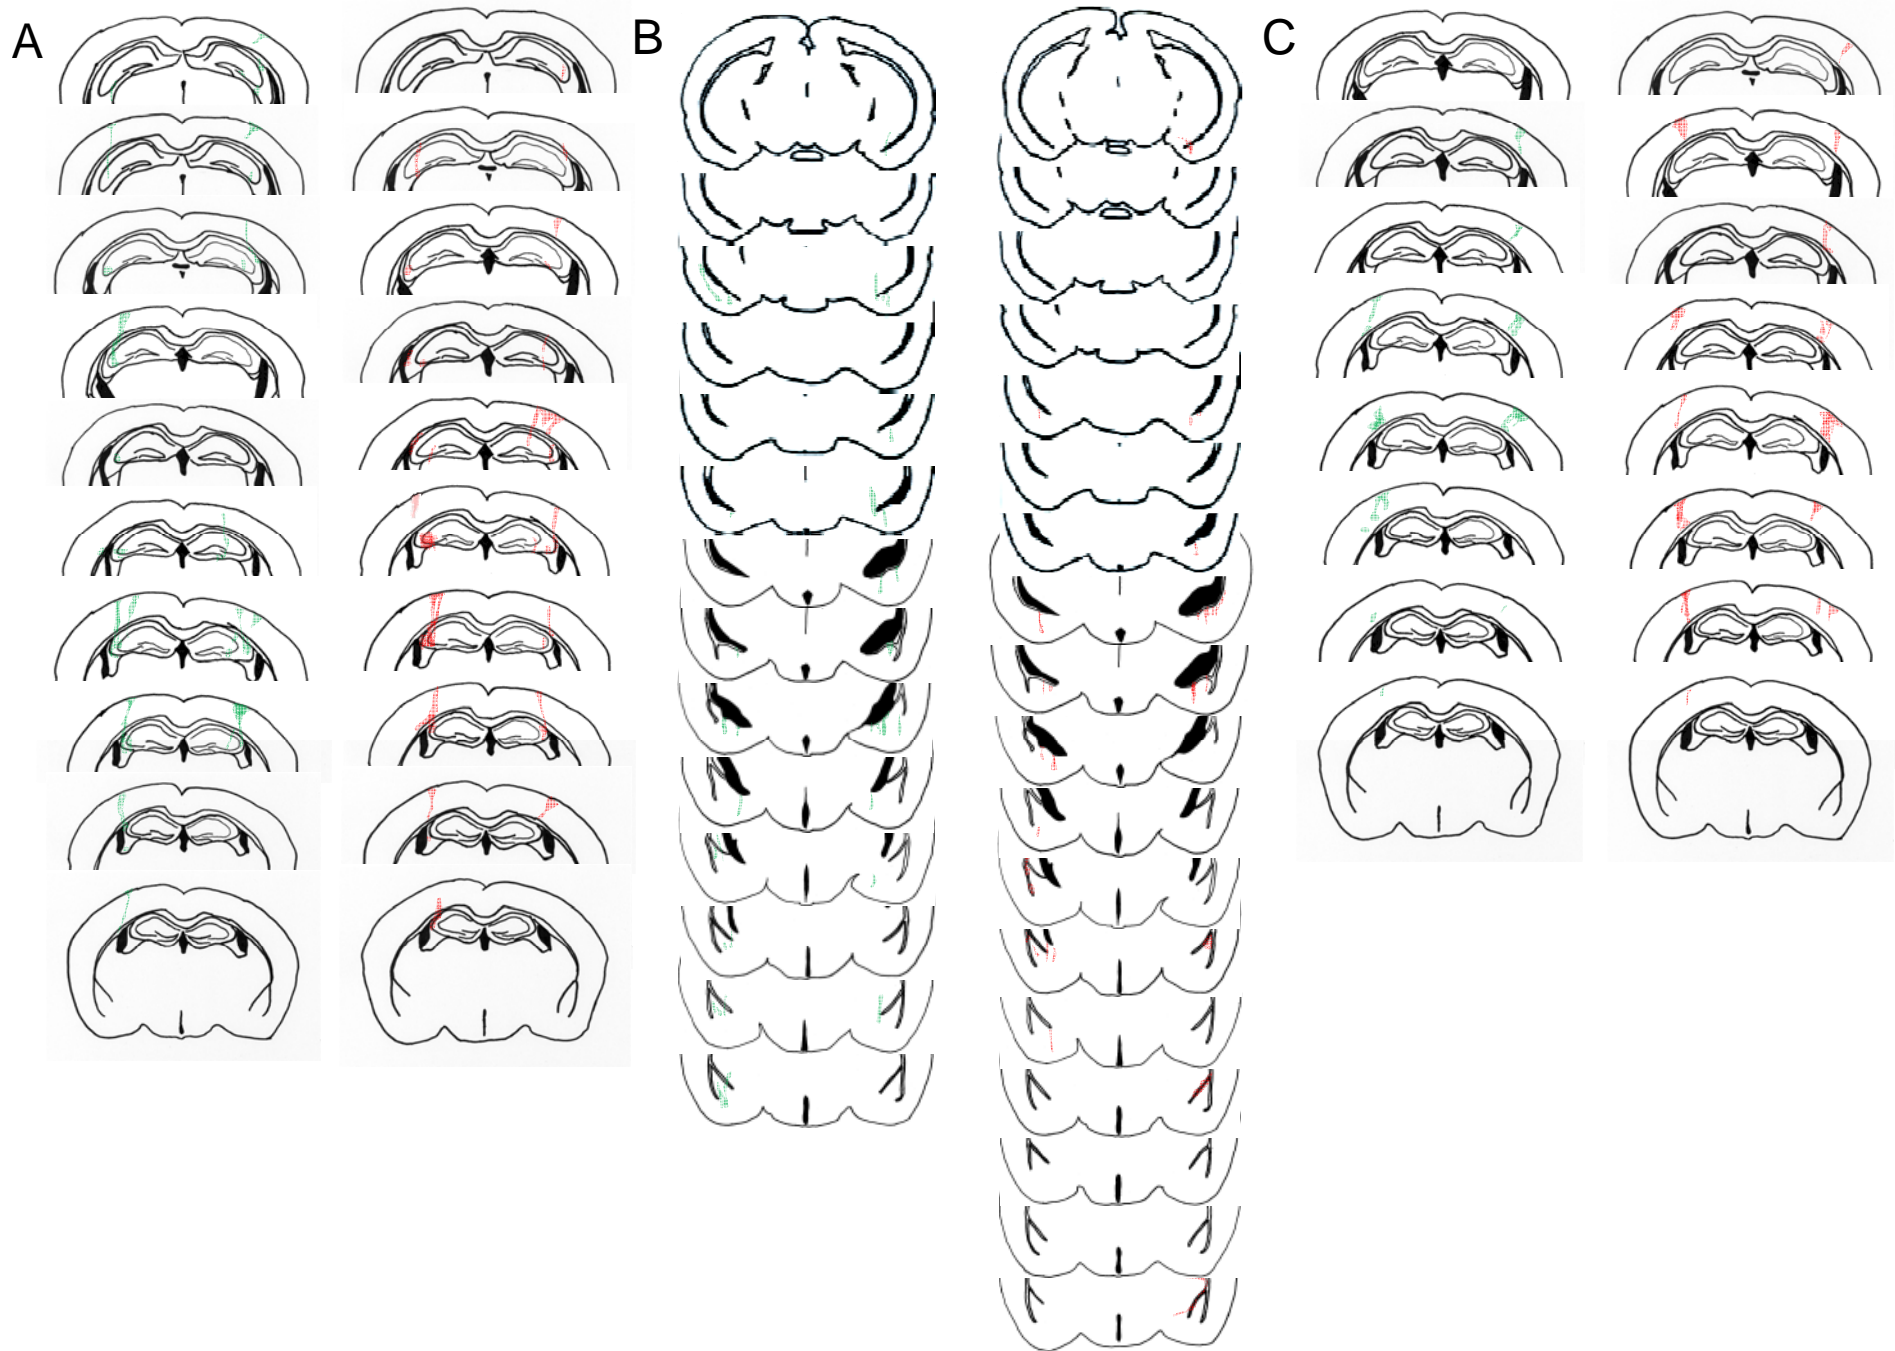

S-Fig 3

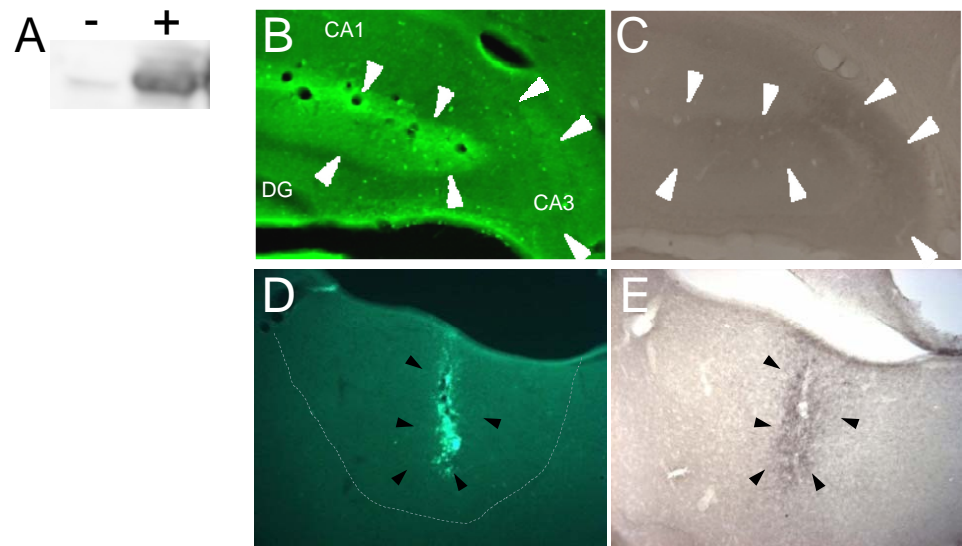

Supplement: supp_dds180_dds180supp_figs.pdf [file supp_dds180_dds180supp_figs.pdf]
